# Supplementary material for: ALKBH5-mediated m6A demethylation of HS3ST3B1-IT1 prevents osteoarthritis progression
Source: PubMed Central journal article supplement — iScience. 2023 Sep 7;26(10):107838. doi: 10.1016/j.isci.2023.107838 (PMC10518728; doi:10.1016/j.isci.2023.107838), 2023-09-07
Supplement: mmc1.pdf [file mmc1.pdf]

**Supplemental information**

**ALKBH5-mediated m<sup>6</sup>A**

**demethylation of HS3ST3B1-IT1 prevents**

**osteoarthritis progression**

**Yuting Tang, Yang Liu, Xiaoshu Zhu, Yanlin Chen, Xinluan Jiang, Siyang Ding, Que Zheng, Ming Zhang, Jiashu Yang, Yunfei Ma, Mengying Xing, Zongyu Zhang, Huimin Ding, Yucui Jin, and Changyan Ma**





**Fig.S5**

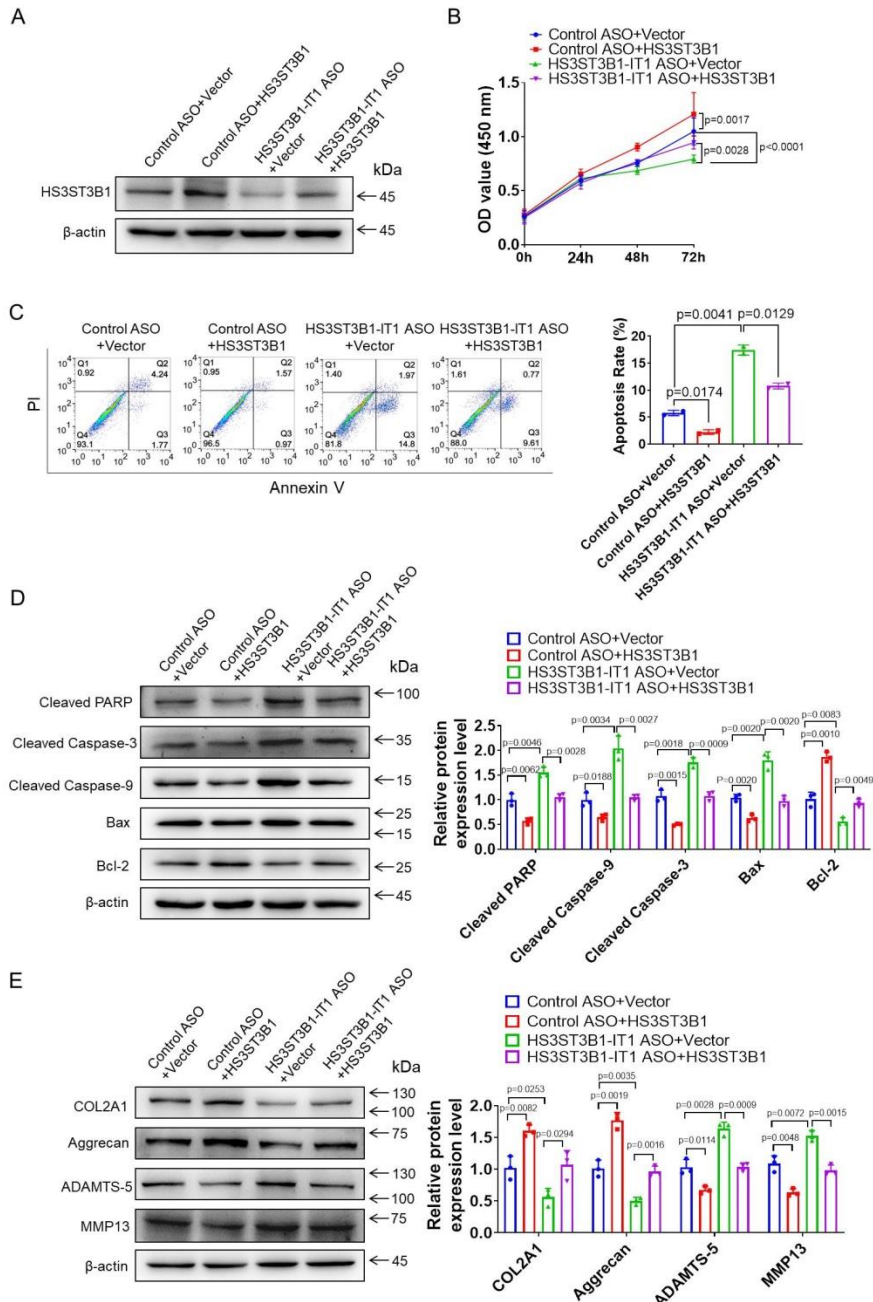

**Figure S5 Overexpression of HS3ST3B1 attenuates the effects of HS3ST3B1-IT1 knockdown on chondrocyte viability, apoptosis and ECM metabolism, related to Figure 6.** (A) Western blotting was performed to assess the expression levels of HS3ST3B1 in chondrocytes transfected with Control ASO+Vector, Control ASO+pCMV3-HS3ST3B1, HS3ST3B1-IT1 ASO+Vector or HS3ST3B1-IT1 ASO+pCMV3-HS3ST3B1. (B) The viability of chondrocytes was evaluated by CCK-8 assay in each group. Values were shown as mean  $\pm$  SD (n=3). (C) The apoptosis rates were evaluated by flow cytometry in each group. Values were shown as mean  $\pm$  SD (n=3). (D) The expression levels of apoptosis-associated proteins were detected by western blotting in each group. Representative blots from three independent experiments were shown (left panel). Densitometric analyses of the blots were presented as mean  $\pm$  SD (n=3, right panel). (E) The expression levels of COL2A1, Aggrecan, MMP13 and ADAMTS-5 were analyzed by western blotting in each group. Representative blots from three independent experiments were shown (left panel). Densitometric analyses of the blots were presented as mean  $\pm$  SD (n=3, right panel). Statistical analysis was performed using a two-way ANOVA followed by Tukey's multiple comparison (B) or an unpaired Student's two-tailed *t* test (C-E).

Fig.S6

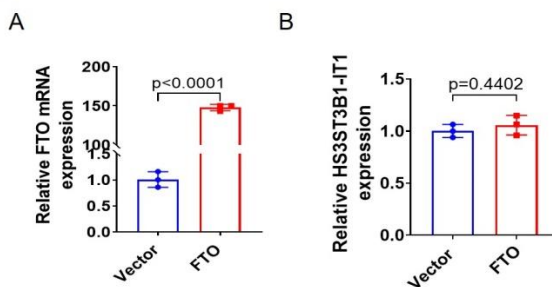

Figure S6 FTO has no obvious effects on HS3ST3B1-IT1 expression, related to Figure 7. qRT-PCR was performed to detect the expression levels of FTO (A) and HS3ST3B1-IT1 (B) in chondrocytes after transfection with FTO expression plasmid. Values were shown as mean  $\pm$  SD (n=3). Statistical differences were determined using an unpaired Student's two-tailed *t* test.

Fig.S7

Figure S7 is a screenshot of the RNA-Protein Interaction Prediction (RPISeq) web interface. The page displays the input sequences for YTHDF2 protein and HS3ST3B1-IT1 RNA. The YTHDF2 protein sequence is shown in red, and the HS3ST3B1-IT1 RNA sequence is shown in blue. The interface also includes a search bar, navigation links, and a section for interaction probabilities. The interaction probabilities are: Prediction using RF classifier: 0.95, Prediction using SVM classifier: 0.79. A FAQ section is also present, explaining what the probabilities mean.

Figure S7 Computational analysis for HS3ST3B1-IT1: YTHDF2 interaction by the RPISeq database (<http://pridb.gdb.iastate.edu/RPISeq/>) based on Random Forest (RF) and Support Vector Machine (SVM) classifiers, related to Figure 7.

**Fig.S8**

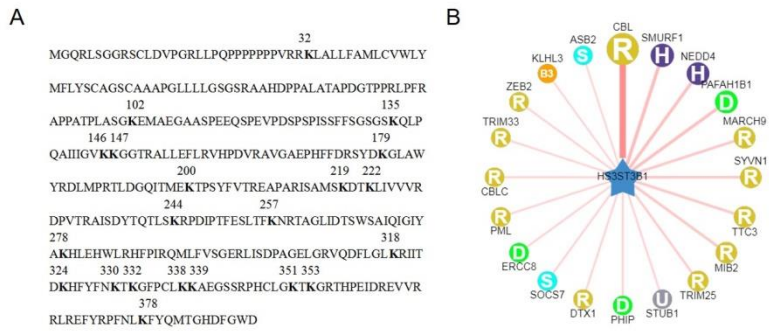

**Figure S8 Prediction of the Ubiquitination Sites (A) and potential E3 ubiquitin ligases (B) by using UbiBrowser (<http://ubibrowser.ncpsb.org/>), related to Figure 5.**

## Supplemental Tables

**Table S3 Logistic regression analysis, related to Figure 1**

| Variable | B      | Std. Error | p value | 95% CI      |
|----------|--------|------------|---------|-------------|
| Age      | -0.058 | 0.039      | 0.140   | 0.874-1.019 |
| BMI      | -0.07  | 0.093      | 0.448   | 0.778-1.118 |
| Sex      | 0.024  | 0.578      | 0.967   | 0.33-3.179  |

B, coefficient; Std. Error, standard error; CI, confidence interval.

**Table S5 Primers used for plasmid construction, related to STAR Methods**

| Plasmid names                | Forward/<br>Reverse | Sequences 5'-3'                    |
|------------------------------|---------------------|------------------------------------|
| pcDNA-HS3ST3B1-IT1           | Forward             | CGGGATCCCTGAGATCAGACACACTTGGGCC    |
|                              | Reverse             | CCCTCGAGAAAAGTTACAGATTTAATTTTTGGTC |
| pEGFP-GFPmut                 | Forward             | GCCACCATTGTGAGCAAGGGCGAGGAGCTGTT   |
|                              | Reverse             | TTGCTCACAATGGTGGCGACCGCCGGTGGAT    |
| pEGFP-ORF-GFPmut             | Forward             | CTCAGATCTCGAGATTGCGGCTGGAC         |
|                              | Reverse             | AATCTCGAGATCTGAGTCCGGTAGCG         |
| psi-CHECK2-HS3ST3B1-IT1 wt   | Forward             | CCCTCGAGCTGAGATCAGACACACTTGGG      |
|                              | Reverse             | GGTTTAAACAGCTTGGCAGAGAGGAGAGAAC    |
| psi-CHECK2-HS3ST3B1-IT1 mut1 | Forward             | ACACTGCGTTCCTGGCCTGCACCAGC         |
|                              | Reverse             | GCCAGGAACGCAGCGCTTGGGGCCAG         |
| psi-CHECK2-HS3ST3B1-IT1 mut2 | Forward             | AACTGACAAGCAGGCCTCCCGGGTCCAGGGGGC  |
|                              | Reverse             | AGGCCTGCTTGTGTCAGTTCAGGGAGATGGCTCG |
| psi-CHECK2-HS3ST3B1-IT1 mut3 | Forward             | ACTGGCAGGAAAAGGCCTGAACCCTT         |
|                              | Reverse             | GCCTTTTCTGCCAGTTCCTCCCAAC          |

**Table S6 Sequences of siRNAs and ASOs, related to STAR Methods**

| Names                         | Sequences 5'-3'       |
|-------------------------------|-----------------------|
| si-NC target sequence         | TTCTCCGAACGTGTCACGT   |
| si-HS3ST3B1 target sequence 1 | GCAAATTCTAGCAGTATGT   |
| si-HS3ST3B1 target sequence 2 | GCAACAAAGCCATAGGAAA   |
| HS3ST3B1-IT1 ASO sequence     | ATTGTACCTCCGCTCTGTCC  |
| LncRNA ASO negative control   | lnc6N0000001, RiboBio |

**Table S7 Primers used for qRT-PCR assay, related to STAR Methods**

| Gene names   | Forward/<br>Reverse | Sequences 5'-3'         |
|--------------|---------------------|-------------------------|
| HS3ST3B1-IT1 | Forward             | CTGAGATCAGACACACTTGGG   |
|              | Reverse             | CCCAGGTGCTTCAAACCG      |
| HS3ST3B1     | Forward             | CCCATCTCCAGCTTTTTCAGTG  |
|              | Reverse             | CTCCATGGTGATCTGCCCGT    |
| ALKBH5       | Forward             | AGTTCCAGTTCAAGCCTATTTCG |
|              | Reverse             | TGAGCACAGTCACGCTTCC     |
| YTHDF2       | Forward             | CCTTAGGTGGAGCCATGATTG   |
|              | Reverse             | TCTGTGCTACCCAACTTCAGT   |
| β-actin      | Forward             | AGATGTGATCAGCAAGCAG     |
|              | Reverse             | GCGCAAGTTAGGTTTTGTCA    |
